# Supplementary material
Source: publisher figshare collection journal article supplement (https://springernature.figshare.com/ndownloader/files/24141610)

## Additional File 8: Map of Samples from 2015

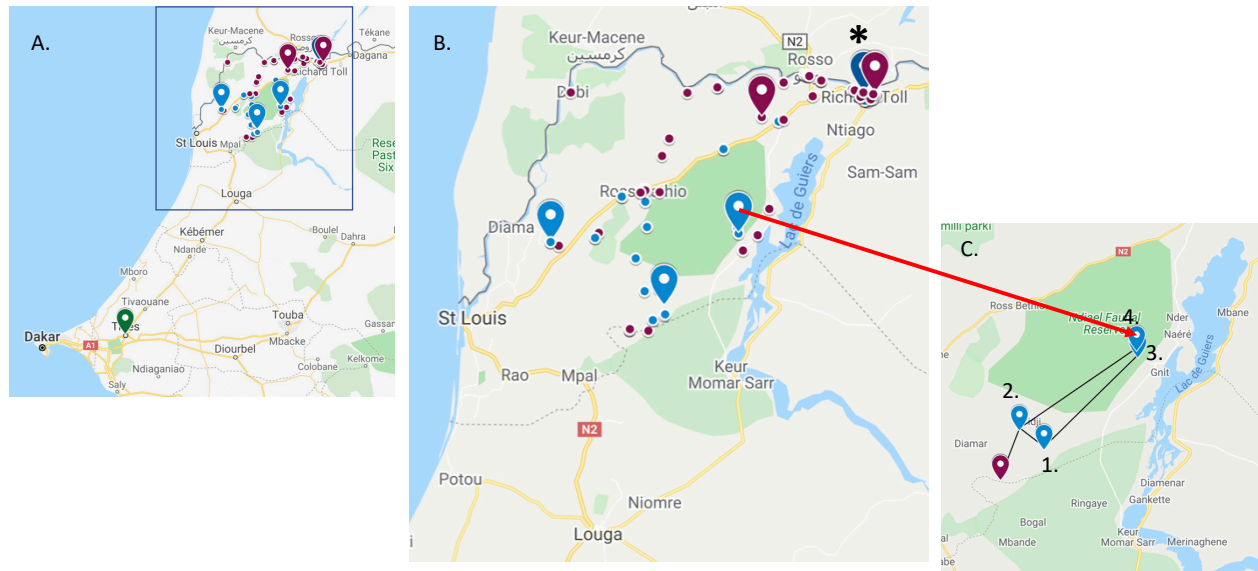

Supplement: Supplementary file [file 24141610]
